# Supplementary material
Source: publisher figshare collection journal article supplement (https://karger.figshare.com/articles/dataset/_/7429070)
Supplement: Supplementary file 1 [file 1]

## SUPPLEMENTARY MATERIAL

**Supplementary Table 1** Search Term Strategy - Keyword alternatives and synonyms

| Concept group 1                                                                                                                                                                                                                                                                                                                                       | Concept group 2                                                                                                                                                                                                                                                                           | Concept group 3                                                                                                                                                                                                                                                                                          | Concept group 4                                                                                                                                                                                                                                                                                                    |
|-------------------------------------------------------------------------------------------------------------------------------------------------------------------------------------------------------------------------------------------------------------------------------------------------------------------------------------------------------|-------------------------------------------------------------------------------------------------------------------------------------------------------------------------------------------------------------------------------------------------------------------------------------------|----------------------------------------------------------------------------------------------------------------------------------------------------------------------------------------------------------------------------------------------------------------------------------------------------------|--------------------------------------------------------------------------------------------------------------------------------------------------------------------------------------------------------------------------------------------------------------------------------------------------------------------|
| Population-related terms                                                                                                                                                                                                                                                                                                                              | Disease-related terms                                                                                                                                                                                                                                                                     | Medication-related terms                                                                                                                                                                                                                                                                                 | Adherence-related terms                                                                                                                                                                                                                                                                                            |
| child*<br>p?diatric<br>infant<br>minor<br>juvenile<br>youth<br>dependent<br>Human<br><br>female<br>male<br>girl<br>boy<br><br>prepubertal<br>pre-pubertal<br>preadolescen*<br>pre-adolescen*<br>preteen*<br>pre-teen*<br>preschool*<br>pre-school*<br><br>patient*<br><br>parent*<br>mother<br>father<br>guardian<br>carer<br>caregiver<br>care-giver | growth<br>growth hormone<br>Growth-hormone<br>GH<br>Human growth hormone<br>HGH<br><br>somatotro?in<br>somatotro?ic<br>pituitary<br><br>growth hormone deficiency<br>growth hormone disorder<br>growth hormone disease<br>growth hormone condition<br>growth hormone insufficiency<br>GHD | treatment<br>therapy<br>replacement<br><br>medic*<br>synthetic<br>recombinant<br>rGH<br>rhGH<br><br>somatropin<br>Genotropin<br>Saizen<br>Zomacton<br>NutropinAq<br>Norditropin<br>Omnitrope<br>Humatrope<br><br>regim*<br>adminst*<br>inject*<br>dos*<br>needle<br>device<br>syringe<br>pen<br>delivery | adheren*<br><br>nonadheren*<br>non-adheren*<br>non adheren*<br><br>complian*<br>noncomplian*<br>non-complian*<br>non complian*<br><br>persistence<br>nonpersisten*<br>non-persisten*<br>non persisten*<br><br>concordan*<br>discordan*<br><br>continu*<br>discontinu*<br>dis-continu*<br><br>duration<br>cessation |

## Supplementary Table 2 Full search strategy

---

### Ovid Medline (R), Embase, PsycINFO, International Pharmaceutical Abstracts

(child\* OR p?diatric OR infant OR minor OR juvenile OR youth OR dependent OR human OR female OR male OR girl OR boy OR prepubertal OR pre-pubertal OR preadolescen\* OR pre-adolescen\* OR preteen\* OR pre-teen\* OR preschool\* OR pre-school\* OR adolescen\* OR pubertal OR teen\* OR patient OR parent OR mother OR father OR guardian OR carer OR caregiver OR care-giver).mp

AND

(growth OR growth hormone OR growth-hormone OR GH OR human growth hormone OR HGH OR somatotro?in OR somatotro?ic OR pituitary OR growth hormone deficiency OR growth hormone disorder OR growth hormone disease OR growth hormone condition OR growth hormone insufficiency OR GHD).mp

AND

(treatment OR therapy OR replacement OR medic\* OR synthetic OR recombinant OR rGH OR rhGH OR somatropin OR Genotropin OR Saizen OR Zomacton OR NutropinAq OR Norditropin OR Omnitrope OR Humatrope OR regim\* OR adminst\* OR inject\* OR dos\* OR needle OR device OR syringe OR pen OR delivery).mp

AND

(adheren\* OR nonadheren\* OR non-adheren\* OR non adheren\* OR complian\* OR noncomplian\* OR non-complian\* OR non complian\* OR persistence OR nonpersisten\* OR non-persisten\* OR non persisten\* OR concordan\* OR discordan\* OR continu\* OR discontinu\* OR dis-continu\* OR duration OR cessation).mp.

*Limits: English Language, Publication Year: 1985-current*

---

### Cochrane Library (Search Manager)

child\* OR p?diatric OR infant OR minor OR juvenile OR youth OR dependent OR human OR female OR male OR girl OR boy OR prepubertal OR pre-pubertal OR preadolescen\* OR pre-adolescen\* OR preteen\* OR pre-teen\* OR preschool\* OR pre-school\* OR adolescen\* OR pubertal OR teen\* OR patient OR parent OR mother OR father OR guardian OR carer OR caregiver OR care-giver

AND

growth OR "growth hormone" OR growth-hormone OR GH OR "human growth hormone" OR HGH OR somatotro?in OR somatotro?ic OR pituitary OR "growth hormone deficiency" OR "growth hormone disorder" OR "growth hormone disease" OR "growth hormone condition" OR "growth hormone insufficiency" OR GHD

AND

treatment OR therapy OR replacement OR medic\* OR synthetic OR recombinant OR rGH OR rhGH OR somatropin OR Genotropin OR Saizen OR Zomacton OR NutropinAq OR Norditropin OR Omnitrope OR Humatrope OR regim\* OR adminst\* OR inject\* OR dos\* OR needle OR device OR syringe OR pen OR delivery

AND

adheren\* OR nonadheren\* OR non-adheren\* OR "non adheren\*" OR complian\* OR noncomplian\* OR non-complian\* OR "non complian\*" OR persistence OR nonpersisten\* OR non-persisten\* OR "non persisten\*" OR concordan\* OR discordan\* OR continu\* OR discontinu\* OR dis-continu\* OR duration OR cessation

---

---

## Web of Science

TS=(child\* OR p?diatric OR infant OR minor OR juvenile OR youth OR dependent OR human OR female OR male OR girl OR boy OR prepubertal OR pre-pubertal OR preadolescen\* OR pre-adolescen\* OR preteen\* OR pre-teen\* OR preschool\* OR pre-school\* OR adolescen\* OR pubertal OR teen\* OR patient OR parent OR mother OR father OR guardian OR carer OR caregiver OR care-giver)

AND

TS=(growth OR "growth hormone" OR "growth-hormone" OR GH OR "human growth hormone" OR HGH OR somatotro?in OR somatotro?ic OR pituitary OR "growth hormone deficiency" OR "growth hormone disorder" OR "growth hormone disease" OR "growth hormone condition" OR "growth hormone insufficiency" OR GHD)

AND

TS=(treatment OR therapy OR replacement OR medic\* OR synthetic OR recombinant OR rGH OR rhGH OR somatropin OR Genotropin OR Saizen OR Zomacton OR NutropinAq OR Norditropin OR Omnitrope OR Humatrope OR regim\* OR adminst\* OR inject\* OR dos\* OR needle OR device OR syringe OR pen OR delivery)

AND

TS=(adheren\* OR nonadheren\* OR non-adheren\* OR non adheren\* OR complian\* OR noncomplian\* OR non-complian\* OR "non complian\*" OR persistence OR nonpersisten\* OR non-persisten\* OR "non persisten\*" OR concordan\* OR discordan\* OR continu\* OR discontinu\* OR dis-continu\* OR duration OR cessation)

*Limits: Language=English. Timespan=1985-2018*

---

## Applied Social Sciences Index and Abstracts (ASSIA)

(ANYWHERE) child\* OR p?diatric OR infant OR minor OR juvenile OR youth OR dependent OR human OR female OR male OR girl OR boy OR prepubertal OR pre-pubertal OR preadolescen\* OR pre-adolescen\* OR preteen\* OR pre-teen\* OR preschool\* OR pre-school\* OR adolescen\* OR pubertal OR teen\* OR patient OR parent OR mother OR father OR guardian OR carer OR caregiver OR care-giver

AND

(ANYWHERE) growth OR "growth hormone" OR "growth-hormone" OR GH OR "human growth hormone" OR somatotro?in OR somatotro?ic OR pituitary OR "growth hormone deficiency" OR "growth hormone disorder" OR "growth hormone disease" OR "growth hormone condition" OR "growth hormone insufficiency"

AND

(ANYWHERE) treatment OR therapy OR replacement OR medic\* OR synthetic OR recombinant OR somatropin OR regim\* OR adminst\* OR inject\* OR dos\* OR needle OR device OR syringe OR pen OR delivery

AND

(ANYWHERE) adheren\* OR nonadheren\* OR non-adheren\* OR "non adheren\*" OR complian\* OR noncomplian\* OR non-complian\* OR "non complian\*" OR persistence OR nonpersisten\* OR non-persisten\* OR "non persisten\*" OR concordan\* OR discordan\* OR continu\* OR discontinu\* OR dis-continu\* OR duration OR cessation

*Limits: Language: English. Publication Date: After this Date: 1 January 1985*

---

---

## Cumulative Index to Nursing and Allied Health Literature (CINAHL)

(TX) child\* OR p#diatric OR infant OR minor OR juvenile OR youth OR dependent OR human OR female OR male OR girl OR boy OR prepubertal OR pre-pubertal OR preadolescen\* OR pre-adolescen\* OR preteen\* OR pre-teen\* OR preschool\* OR pre-school\* OR adolescen\* OR pubertal OR teen\* OR patient\* OR parent\* OR mother OR father OR guardian OR carer OR caregiver OR care-giver

AND

(TX) growth OR "growth hormone" OR "growth-hormone" OR GH OR "human growth hormone" OR somatotro#in" OR "somatotro#ic" OR pituitary OR "growth hormone deficiency" OR "growth hormone disorder" OR "growth hormone disease" OR "growth hormone condition" OR "growth hormone insufficiency"

AND

(TX) treatment OR therapy OR replacement OR medic\* OR synthetic OR recombinant OR somatropin OR regim\* OR adminst\* OR inject\* OR dos\* OR needle OR device OR syringe OR pen OR delivery

AND

(TX) adheren\* OR nonadheren\* OR non-adheren\* OR non adheren\* OR complian\* OR noncomplian\* OR non-complian\* OR "non complian\*" OR persistence OR nonpersisten\* OR non-persisten\* OR "non persisten\*"

*Limits: English Language. Published Date: January 1985– January 2018*

---

## Open Grey

child\* OR pediatric OR paediatric

AND

growth OR "growth hormone"

AND

treatment OR therapy OR medic\*

AND

adheren\* OR complian\* OR persisten\*

*Limits: Language: English, Year: 1985-2018*

---

## ETHOS

(Any word) child\* OR pediatric OR paediatric

AND

(Any word) growth hormone

---

## WorldCat Dissertation and Theses

(Keyword:) child\* OR pediatric OR paediatric

AND

(Keyword:) growth OR "growth hormone"

*Limits: Language: English, Year: 1985 to 2018*

---

**Supplementary Table 3** PICOS inclusion/exclusion criteria

| Inclusion criteria                                                                                                                                                                       | Exclusion criteria                                                                                                                                                                                                                                                                                     |
|------------------------------------------------------------------------------------------------------------------------------------------------------------------------------------------|--------------------------------------------------------------------------------------------------------------------------------------------------------------------------------------------------------------------------------------------------------------------------------------------------------|
| Studies were <b>included</b> if they met the following criteria:                                                                                                                         | Studies were <b>excluded</b> if they met the following criteria:                                                                                                                                                                                                                                       |
| Females and males aged between 0.0 years and an upper age limit of 18.0 years.                                                                                                           | Female and male adults >18.0 years.                                                                                                                                                                                                                                                                    |
| <ul style="list-style-type: none"> <li>- Studies using single samples, (e.g. pre-pubertal, adolescents) or mixed samples (e.g. children and adolescents with GHD)</li> </ul>             | Non-human (Animal) studies                                                                                                                                                                                                                                                                             |
| Paediatric Patients with a clinical diagnosis of Growth Hormone Deficiency                                                                                                               | Paediatric patients identified as having specific or significant symptoms of GHD, borderline, or undiagnosed, or patients with any other pathological conditions.                                                                                                                                      |
| Parents/carers of Paediatric Patients with a clinical diagnosis of Growth Hormone Deficiency                                                                                             | Individuals diagnosed with forms of short stature or growth failure due to: chronic renal failure, Turner Syndrome, Prader-Willi Syndrome, small for gestational age, idiopathic short stature, short stature homeobox-containing gene deficiency (SHOX), Noonan Syndrome and Silver Russell Syndrome. |
| <ul style="list-style-type: none"> <li>- Growth Hormone Deficiency includes sub-groups of idiopathic or secondary/acquired, isolated or multiple pituitary hormone deficiency</li> </ul> |                                                                                                                                                                                                                                                                                                        |
| Patients prescribed with Growth Hormone Treatment.                                                                                                                                       | Growth hormone not prescribed                                                                                                                                                                                                                                                                          |
| Randomised controlled trials (RCT) and non-RCTs (prospective cohort and retrospective cohort studies) or Cross-sectional.                                                                | Non-empirical, general discussion, or, narrative reviews or theoretical papers, case studies, or qualitative studies.                                                                                                                                                                                  |
| Standardised measure/method of assessment of adherence (both validated/non-validated methods) explicitly identifiable.                                                                   | No measure method of assessment of adherence.                                                                                                                                                                                                                                                          |
| Prevalence rate of adherence/non-adherence for Growth Hormone Deficiency explicitly extractable.                                                                                         | No prevalence rate of adherence/non-adherence.                                                                                                                                                                                                                                                         |
|                                                                                                                                                                                          | Prevalence rate of adherence/non-adherence for combined growth disorders.                                                                                                                                                                                                                              |
| Psychosocial, clinical or socio-demographic factors associated with adherence explicitly identifiable                                                                                    | Sole focus on various variables including Growth Response, Height, Height Standard Deviation Score, Growth Velocity, Growth Velocity Standard Deviation Score, Body Composition, BMI or metabolic markers or effects, adverse effects of treatment, health-related quality of life.                    |
| Studies published between 1985 – 2017                                                                                                                                                    | Studies published pre- 1985                                                                                                                                                                                                                                                                            |
| English-language studies                                                                                                                                                                 | Non-English language studies                                                                                                                                                                                                                                                                           |

**Supplementary Table 4** Inclusion / Exclusion Screening Table

[illegible]

|                        |      |                      |                      |     |     |     |     |     |     |     |         |
|------------------------|------|----------------------|----------------------|-----|-----|-----|-----|-----|-----|-----|---------|
| Bozzola et al. [33]    | 2014 | Yes                  | Yes                  | Yes | No  | No  | No  | No  | Yes | Yes | Exclude |
| Drosatou et al. [34]   | 2014 | Yes                  | <i>Not specified</i> | Yes | Yes | Yes | No  | Yes | Yes | No  | Exclude |
| Miller et al. [35]     | 2014 | Yes                  | Yes                  | Yes | No  | Yes | Yes | Yes | Yes | Yes | Exclude |
| Hartman et al. [12]    | 2013 | Yes                  | Yes                  | Yes | Yes | Yes | Yes | Yes | Yes | Yes | Include |
| Cutfield et al. [3]    | 2011 | Yes                  | Yes                  | Yes | Yes | Yes | No  | Yes | Yes | Yes | Include |
| Kapoor et al. [17]     | 2008 | Yes                  | Yes                  | Yes | Yes | Yes | Yes | Yes | Yes | Yes | Include |
| Rosenfeld & Bakker [2] | 2008 | Yes                  | Yes                  | Yes | Yes | Yes | Yes | Yes | Yes | Yes | Include |
| Oyarzabel et al. [36]  | 1998 | No                   | <i>Not specified</i> | Yes | Yes | Yes | No  | Yes | Yes | Yes | Exclude |
| Smith et al. [10]      | 1993 | <i>Not specified</i> | <i>Not specified</i> | Yes | Yes | Yes | No  | Yes | Yes | Yes | Exclude |
| Leiberman et al. [37]  | 1993 | Yes                  | Yes                  | Yes | Yes | No  | No  | No  | Yes | Yes | Exclude |
| Gacs et al. [38]       | 1991 | Yes                  | Yes                  | Yes | No  | Yes | Yes | Yes | Yes | Yes | Exclude |

---

**Supplementary Table 5** Full reasons for exclusion table

| Author                 | Study Title                                                                                                                        | Publication Year | Reason for Exclusion                                                                                                                                                                                                                                                                         |
|------------------------|------------------------------------------------------------------------------------------------------------------------------------|------------------|----------------------------------------------------------------------------------------------------------------------------------------------------------------------------------------------------------------------------------------------------------------------------------------------|
| Mohseni et al. [15]    | <i>Adherence to growth hormone therapy in children and its potential barriers</i>                                                  | 2018             | <ul style="list-style-type: none"> <li>• Patient clinical indications not specified.</li> </ul>                                                                                                                                                                                              |
| Bagnasco et al. [24]   | <i>Prevalence and Correlates of Adherence in Children and Adolescents treated with Growth Hormone: a Multicenter Italian Study</i> | 2017             | <ul style="list-style-type: none"> <li>• Patient clinical indications not specified.</li> <li>• Adherence rate for GHD patients not reported.</li> </ul>                                                                                                                                     |
| Ergur et al. [25]      | <i>The adherence to Growth Hormone Therapy in children with Growth Hormone Deficiency</i>                                          | 2017             | <ul style="list-style-type: none"> <li>• Adherence rate for GHD patients not reported.</li> <li>• Abstract only – no access to full-text copy.</li> <li>• Psychosocial, clinical or sociodemographic factor(s) associated with adherence cannot be explicitly identified.</li> </ul>         |
| Farfel et al. [26]     | <i>Long term adherence to growth Hormone Therapy in a large health maintenance organization cohort.</i>                            | 2017             | <ul style="list-style-type: none"> <li>• Patient clinical indications not specified.</li> <li>• Adherence rate for GHD patients not reported.</li> <li>• Abstract - no full-text copy.</li> </ul>                                                                                            |
| Sayarifard et al. [27] | <i>Growth Hormone Utilization Review in a Pediatric Primary Care Setting.</i>                                                      | 2017             | <ul style="list-style-type: none"> <li>• Clearly-defined measure of adherence not identified.</li> <li>• Adherence rate for GHD patients not reported.</li> </ul>                                                                                                                            |
| Hughes et al. [28]     | <i>Early cessation and non-response are important and possibly related problems in growth hormone therapy: An OZGROW analysis</i>  | 2016             | <ul style="list-style-type: none"> <li>• Clearly-defined measure of adherence not identified.</li> <li>• Psychosocial, clinical or sociodemographic factor(s) associated with adherence cannot be explicitly identified.</li> <li>• Adherence rate for GHD patients not reported.</li> </ul> |
| De Pedro et al. [29]   | <i>Variability in adherence to rhGH treatment: Socioeconomic causes and effect on children's growth</i>                            | 2015             | <ul style="list-style-type: none"> <li>• Adherence rate for GHD patients not reported.</li> </ul>                                                                                                                                                                                            |
| Kremidas et al. [30]   | <i>Administration Burden Associated with Recombinant Human Growth Hormone Treatment: Perspectives of Patients and Caregivers</i>   | 2015             | <ul style="list-style-type: none"> <li>• Patient group includes &gt;18 years.</li> <li>• Clearly-defined measure of adherence not identified.</li> <li>• Adherence rate for GHD patients not reported.</li> </ul>                                                                            |
| Bozzola et al. [33]    | <i>Adherence to Growth Hormone Therapy: A Practical Approach</i>                                                                   | 2014             | <ul style="list-style-type: none"> <li>• Clearly-defined measure of adherence not identified.</li> <li>• Psychosocial, clinical or sociodemographic factor(s) associated with adherence cannot be explicitly identified.</li> <li>• Adherence rate for GHD patients not reported.</li> </ul> |

|                       |                                                                                                                                       |      |                                                                                                                                                                                                                              |
|-----------------------|---------------------------------------------------------------------------------------------------------------------------------------|------|------------------------------------------------------------------------------------------------------------------------------------------------------------------------------------------------------------------------------|
| Miller et al. [35]    | <i>Persistence with Growth Hormone Therapy in Pediatric Patients</i>                                                                  | 2014 | <ul style="list-style-type: none"> <li>• Clearly-defined measure of adherence not identified.</li> </ul>                                                                                                                     |
| Drosatou et al. [34]  | <i>Assessment of Compliance with GH Therapy</i>                                                                                       | 2014 | <ul style="list-style-type: none"> <li>• Patient clinical indications not specified.</li> <li>• Adherence rate for GHD patients not reported.</li> <li>• Abstract only- no access to full-text copy.</li> </ul>              |
| Oyarzabel et al. [36] | <i>Multicentre survey on compliance with growth hormone therapy: what can be improved?</i>                                            | 1998 | <ul style="list-style-type: none"> <li>• Patient clinical indications not specified.</li> <li>• Patient group includes &gt;18 years.</li> <li>• Adherence rate for GHD patients not reported.</li> </ul>                     |
| Leiberman et al. [37] | <i>Coping and Satisfaction with Growth Hormone Treatment among Short-Stature Children</i>                                             | 1993 | <ul style="list-style-type: none"> <li>• Adherence rate for GHD patients not reported.</li> <li>• Psychosocial, clinical or sociodemographic factor(s) associated with adherence cannot be explicitly identified.</li> </ul> |
| Smith et al [10].     | <i>Compliance with growth hormone treatment--are they getting it?</i>                                                                 | 1993 | <ul style="list-style-type: none"> <li>• Patient clinical indications not specified.</li> <li>• Patient age not specified.</li> <li>• Adherence rate for GHD patients not reported.</li> </ul>                               |
| Gacs et al. [38]      | <i>The effect of socio-economic conditions on the time of diagnosis and compliance during treatment in growth hormone deficiency.</i> | 1991 | <ul style="list-style-type: none"> <li>• Clearly-defined measure of adherence not identified.</li> </ul>                                                                                                                     |

**Supplementary Table 6** Full Data Extraction Table

**a) Study Details and Study Population**

| Author                 | Study Title                                                                                                     | Publication Year | Country     | Sample Size                                                            | Gender N (%)                     | Mean Age: y.m                                                                             | Clinical Indication of GH Therapy. N (%)                                                                                                                        | Duration of GH Therapy      |
|------------------------|-----------------------------------------------------------------------------------------------------------------|------------------|-------------|------------------------------------------------------------------------|----------------------------------|-------------------------------------------------------------------------------------------|-----------------------------------------------------------------------------------------------------------------------------------------------------------------|-----------------------------|
| Lass et al.[31]        | <i>Low Treatment Adherence in Pubertal Children Treated with Thyroxin or Growth Hormone</i>                     | 2015             | Germany     | 103 patients                                                           | 67 (65) male<br>36 (35) female   | 10.1 (range 8.1-12.2)                                                                     | GHD = 74 (72)<br>Turner Syndrome= 4 (4)<br>SHOX deficiency= 3 (3)<br>Small for gestational age= 21 (20)<br>Prader-Willi-syndrome= 1 (1)                         | Mean: 3.1 years (1.4 - 5.4) |
| Aydin et al.[32]       | <i>Adherence to Growth Hormone Therapy: Results of a Multicenter Study.</i>                                     | 2014             | Turkey      | 217 GH-naïve patients in 6 pediatric endocrinology clinics             | 114 (53) boys<br>103 (47) girls  | 11.1±3.1 years                                                                            | GHD = 185 (85.3)<br>Turner Syndrome = 16 (7.4)<br>Neurosecretory Dysfunction = 6 (2.8)<br>Interuterine Growth Retardation = 5 (2.3)<br>Bioinactive GH = 5 (2.3) | 1 year                      |
| Hartman et al.[12]     | <i>Growth hormone treatment adherence in prepubertal and pubertal children with different growth disorders.</i> | 2013             | Germany     | 75 children                                                            | 46 (61) boys<br>29 (39) girls    | 12.5±3.5 years                                                                            | GHD = 48 (64)<br>Turner Syndrome= 6 (8)<br>Small for gestational age= 18 (24)<br>Chronic Renal Failure = 3 (4)                                                  | <i>Not specified</i>        |
| Cutfield et al.[3]     | <i>Non-compliance with growth hormone treatment in children is common and impairs linear growth.</i>            | 2011             | New Zealand | 175 patients                                                           | 84 (48) males<br>91 (52) females | 12.1±0.6 years                                                                            | GHD = 100 (57%)<br>Turner Syndrome = 47 (27%)<br>Idiopathic short stature = 12 (7%)<br>Small for gestational age = 11 (6%)<br>Prader Willi Syndrome = 5 (3%)    | <i>Not specified</i>        |
| Kapoor et al.[17]      | <i>Monitoring of concordance in growth hormone therapy</i>                                                      | 2008             | UK          | 75 patients                                                            | 47 (63) male<br>28 (37) female   | Median age: 12.3 years (range 8.9–14.8)<br><i>Mean age not specified</i>                  | GHD = 75 (100%)                                                                                                                                                 | 1.9 years (1.2–4.0)         |
| Rosenfeld & Bakker [2] | <i>Compliance and persistence in pediatric and adult patients receiving growth hormone therapy.</i>             | 2008             | USA         | 724 [326 Adolescents (13-17yrs) and 398 parents of children (4-12yrs)] | <i>Not specified</i>             | Adolescents (13-17yrs) and parents of children (4-12yrs)<br><i>Mean age not specified</i> | GHD = 326 and 398 of parents of children with GHD, Turner Syndrome or Idiopathic short stature                                                                  | <i>Not specified</i>        |

## b) Study Details and Key Findings

| Study Details    |      |         |                            | Primary Outcome Findings                                                                       |                                     |                                                                                                                                                                                                                                                                                                                                                                                                                                                                                       | Key Factor Findings                                                                                                                                                                                                                                                                                                               |                                                                                                                                                                                                              |                                                                                                                                                      | Quality       |
|------------------|------|---------|----------------------------|------------------------------------------------------------------------------------------------|-------------------------------------|---------------------------------------------------------------------------------------------------------------------------------------------------------------------------------------------------------------------------------------------------------------------------------------------------------------------------------------------------------------------------------------------------------------------------------------------------------------------------------------|-----------------------------------------------------------------------------------------------------------------------------------------------------------------------------------------------------------------------------------------------------------------------------------------------------------------------------------|--------------------------------------------------------------------------------------------------------------------------------------------------------------------------------------------------------------|------------------------------------------------------------------------------------------------------------------------------------------------------|---------------|
| Author           | Year | Country | Study Design               | Method of assessing adherence                                                                  | Observation Time Period             | Definition of non-adherence                                                                                                                                                                                                                                                                                                                                                                                                                                                           | Prevalence of Non-adherence/ Adherence for GHD                                                                                                                                                                                                                                                                                    | Factors Associated with Non Adherence                                                                                                                                                                        | Factors not Associated with Non-Adherence                                                                                                            | Quality Score |
| Lass et al.[31]  | 2015 | Germany | Retrospective              | Prescription refill rates                                                                      | 1 year                              | Calculated as percentage based on the prescription refill rates according to the literature (Osterberg 2005): Prescribed dosage was divided by required dosage and multiplied by 100. Adherence data were evaluated in accordance with the cut-offs as proposed by Cutfield et al (2011) {good adherence: <1 missed dose per week (>85% adherence); medium adherence: 1-3 missed doses per week (57.1-85.7% adherence); poor adherence: >3 missed doses per week (<57.1% adherence)]. | Adherence rate of GHD children treated with with rhGH (n=74) was good in 53%, medium in 23% and poor in 24%.                                                                                                                                                                                                                      | Treatment duration<br>Puberty (age)<br>Self-administration                                                                                                                                                   | Type of injection device                                                                                                                             | Good          |
| Aydin et al.[32] | 2014 | Turkey  | Longitudinal observational | Patient Self report Questionnaire - evaluated at initiation, 3rd, 6th and 12 month of therapy. | 1 year (3, 6, 12 month time-points) | Adherence categories were established following the criteria of Smith (1993) and patients categorized into 4 adherence segments based on percentage of doses omitted at each evaluation period. Classified as excellent if 0%, good if 5%, fair if 5-10%, and poor if >10%.                                                                                                                                                                                                           | 3 months: adherence rate was excellent in 87.0% of cases, good in 8.1%, fair in 1.6% and poor in 3.2% of cases.<br>6 months: adherence was excellent in 85.4%, good in 7.0%, fair in 2.7% and poor in 4.9% of patients.<br>12 months: adherence was excellent in 77.3%. good in 13.5%, fair in 2.2% and poor in 7.0% of patients. | Forgetting to administer GH<br>Failure to renew the prescription<br>Problems with the delivery service<br>Illness<br>Vacation/break<br>Patient or person who administered the injection being away from home | Cause of GH treatment<br>Socioeconomic status of the family<br>Person who administered the injections<br>Type of injection device<br>GH product used | Good          |

|                           |      |             |                             |                                                                                                                                            |                                             |                                                                                                                                                                                                                                                                                                                                                                                                                                   |                                                                                                                                                                                           |                                                                                                                                                                                                                    |                                                                                     |      |
|---------------------------|------|-------------|-----------------------------|--------------------------------------------------------------------------------------------------------------------------------------------|---------------------------------------------|-----------------------------------------------------------------------------------------------------------------------------------------------------------------------------------------------------------------------------------------------------------------------------------------------------------------------------------------------------------------------------------------------------------------------------------|-------------------------------------------------------------------------------------------------------------------------------------------------------------------------------------------|--------------------------------------------------------------------------------------------------------------------------------------------------------------------------------------------------------------------|-------------------------------------------------------------------------------------|------|
| <b>Hartman et al.[12]</b> | 2013 | Germany     | Prospective Observational   | Easypod® administration device in conjunction with the clinical kit software - Easypod® Connect Software.                                  | 343 ±201 days                               | Compliance was defined by Cutfield et al.(2011) : good compliance, <1 missed dose per week (85.7–100% proportion injected); medium compliance, 1–3 missed doses per week (57.1–85.7% proportion injected), and poor compliance, >3 missed doses per week (<57.1% proportion injected).                                                                                                                                            | Children with GHD showed poor compliance 22.9%, with 77.1% showing good compliance.                                                                                                       | Age (increasing)                                                                                                                                                                                                   | Diagnosis                                                                           | Good |
| <b>Cutfield et al.[3]</b> | 2011 | New Zealand | Cross-sectional survey      | Two parameters: either the number of GH vials requested (GHreq) by the family each month or the number of empty GH vials returned (GHret). | 4 months                                    | Compliance was defined as ≥85% adherence (no more than one missed dose a week on average) to prescribed treatment. High compliance (missed<1 dose a week on average), Medium (missed >1 and <3 doses/week), and Low (missed ≥3 doses/week).                                                                                                                                                                                       | The overall estimated rate of non-compliance (i.e. patients missing more than one injection per week) was 66% (73/110) according to GHret ( <i>and 34% (59/172) according to Ghreq</i> ). | Maori ethnicity                                                                                                                                                                                                    | Age<br>Gender<br>Clinical diagnosis<br>Area of residence                            | Good |
| <b>Kapoor et al.[17]</b>  | 2008 | UK          | Retrospective observational | Issued rhGH prescriptions                                                                                                                  | 3 x 1 year (1999–2000; 2000–2001;2002–2003) | Concordance was objectively assessed by comparing total expected GH usage to the total amount of GH prescribed by GPs during a 12-month period. The annual deficit in GH prescribed compared to that expected was calculated. The estimated number of missed injections per week was calculated. Frequency of missed injections: injections missed: >1 per week; injections missed: 1-2 per week; injections missed: >2 per week. | [62% non-compliant]<br>More than >1 injection/week was missed by 39% (29/75) of the children, and 23% (17/75) missed >2 injections/week.                                                  | Longer duration of treatment<br>Lack of choice of injection device<br>Short duration of GH prescriptions (<4 weeks)<br>Type of health professional providing training<br>Growth response - reduced height velocity | Age<br>Type of injection device used<br>Initial height standard deviation score SDS | Good |

|                                   |      |     |               |                                                                   |          |                                                                                                                                                                                                                                                                                                                                                                                                      |                                                                                           |                                                                                                                                                                                                                                                                                                                                                                                                                                                                                                       |                                            |      |
|-----------------------------------|------|-----|---------------|-------------------------------------------------------------------|----------|------------------------------------------------------------------------------------------------------------------------------------------------------------------------------------------------------------------------------------------------------------------------------------------------------------------------------------------------------------------------------------------------------|-------------------------------------------------------------------------------------------|-------------------------------------------------------------------------------------------------------------------------------------------------------------------------------------------------------------------------------------------------------------------------------------------------------------------------------------------------------------------------------------------------------------------------------------------------------------------------------------------------------|--------------------------------------------|------|
| <b>Rosenfeld &amp; Bakker [2]</b> | 2008 | USA | Retrospective | Self-report questionnaire and interview via telephone or internet | 3 months | Compliance was defined by a categorical assessment of frequency of missed GH doses based on potential reasons. Compliance segments were created on the basis of the number of '4'(never) responses. Patients categorised into 3 segments: Highly compliant (8-9 'never' responses), occasionally noncompliant (6-7 'never' responses), or noncompliant and skeptical (5 or fewer 'never' responses). | [Overall = 71%] 64% of parents of children and 77% of teens yielded noncompliance levels. | Understanding about GHD<br>Understanding of prescribed rhGH treatment<br>Misperceptions about the consequences of missed rhGH doses/minimisation of the seriousness of missed doses of GH<br>Inadequate contact with health-care providers<br>Training and rhGH administration technique (poor injection technique)<br>Acceptance and satisfaction with GH therapy<br>Discomfort with injections / Pain<br>Age - Adolescence<br>Dissatisfaction with treatment results<br>Doctor-patient relationship | Diagnosis<br>Type of injection device used | Fair |
|-----------------------------------|------|-----|---------------|-------------------------------------------------------------------|----------|------------------------------------------------------------------------------------------------------------------------------------------------------------------------------------------------------------------------------------------------------------------------------------------------------------------------------------------------------------------------------------------------------|-------------------------------------------------------------------------------------------|-------------------------------------------------------------------------------------------------------------------------------------------------------------------------------------------------------------------------------------------------------------------------------------------------------------------------------------------------------------------------------------------------------------------------------------------------------------------------------------------------------|--------------------------------------------|------|

**Supplementary Table 7** Full Quality Assessment table for included studies

| Criteria                                                                                                                                                                                                                                                                 | Study<br>Lass<br>al.[31] | et<br>Aydin<br>al.[32] | et<br>Hartman<br>et al.[12] | Cutfield<br>et<br>al.[3] | et<br>Kapoor<br>et<br>al.[17] | Rosenfeld&<br>Bakker [2] |
|--------------------------------------------------------------------------------------------------------------------------------------------------------------------------------------------------------------------------------------------------------------------------|--------------------------|------------------------|-----------------------------|--------------------------|-------------------------------|--------------------------|
| <b>1. Research Question</b><br>Was the research question or objective in this paper clearly stated?                                                                                                                                                                      | Y                        | Y                      | Y                           | Y                        | Y                             | Y                        |
| <b>2. Study Population</b><br>Was the study population clearly specified and defined?                                                                                                                                                                                    | Y                        | Y                      | Y                           | Y                        | Y                             | Y                        |
| <b>3. Participation Rate</b><br>Was the participation rate of eligible persons at least 50%?                                                                                                                                                                             | NR                       | CD                     | Y                           | Y                        | Y                             | N                        |
| <b>4. Inclusion Criteria</b><br>Were all the subjects selected or recruited from the same or similar populations (including the same time period)? Were inclusion and exclusion criteria for being in the study pre-specified and applied uniformly to all participants? | Y                        | Y                      | Y                           | Y                        | Y                             | Y                        |
| <b>5. Sample Size</b><br>Was a sample size justification, power description, or variance and effect estimates provided?                                                                                                                                                  | N                        | N                      | N                           | N                        | N                             | N                        |
| <b>6. Exposure prior to outcome</b><br>For the analyses in this paper, were the exposure(s) of interest measured prior to the outcome(s) being measured?                                                                                                                 | Y                        | Y                      | Y                           | CD                       | Y                             | N                        |
| <b>7. Sufficient timeframe</b><br>Was the timeframe sufficient so that one could reasonably expect to see an association between exposure and outcome if it existed?                                                                                                     | Y                        | Y                      | Y                           | Y                        | Y                             | Y                        |
| <b>8. Different levels of exposure</b><br>For exposures that can vary in amount or level, did the study examine different levels of the exposure as related to the outcome (e.g., categories of exposure, or exposure measured as continuous variable)?                  | Y                        | Y                      | Y                           | Y                        | Y                             | Y                        |

NOTE: \*Y = Yes; N= No, NR = not reported; CD = cannot determine; N/A = not applicable.

|                                                                                                                                                                                           |             |             |             |             |             |             |
|-------------------------------------------------------------------------------------------------------------------------------------------------------------------------------------------|-------------|-------------|-------------|-------------|-------------|-------------|
| <b>9. Exposure measures</b><br>Were the exposure measures (independent variables) clearly defined, valid, reliable, and implemented consistently across all study participants?           | Y           | N           | Y           | Y           | Y           | Y           |
| <b>10. Multiple exposure assessment</b><br>Was the exposure(s) assessed more than once over time?                                                                                         | N           | Y           | N           | N           | N           | N           |
| <b>11. Outcome measures</b><br>Were the outcome measures (dependent variables) clearly defined, valid, reliable, and implemented consistently across all study participants?              | Y           | Y           | Y           | Y           | Y           | Y           |
| <b>12. Blinding of outcome assessors</b><br>Were the outcome assessors blinded to the exposure status of participants?                                                                    | NA          | NA          | NA          | NA          | NA          | NA          |
| <b>13. Loss to follow-up</b><br>Was loss to follow-up after baseline 20% or less?                                                                                                         | NR          | Y           | Y           | NA          | N           | NA          |
| <b>14. Potential confounding</b><br>Were key potential confounding variables measured and adjusted statistically for their impact on the relationship between exposure(s) and outcome(s)? | Y           | Y           | Y           | Y           | Y           | Y           |
| <b>* Quality Rating (Good, Fair, or Poor)</b>                                                                                                                                             | <b>Good</b> | <b>Good</b> | <b>Good</b> | <b>Good</b> | <b>Good</b> | <b>Fair</b> |

**Supplementary Table 8** Summary Data Extraction Table

| Study Details               |                            | Study Population      |                       |                                                                                                                                                                 | Primary Outcome                                                                                           |                                                                                                                                                                                                                                                                                                                                   | Key Findings                                                                                                                                                                                                 |                                                                                                                                                      |                | Quality |
|-----------------------------|----------------------------|-----------------------|-----------------------|-----------------------------------------------------------------------------------------------------------------------------------------------------------------|-----------------------------------------------------------------------------------------------------------|-----------------------------------------------------------------------------------------------------------------------------------------------------------------------------------------------------------------------------------------------------------------------------------------------------------------------------------|--------------------------------------------------------------------------------------------------------------------------------------------------------------------------------------------------------------|------------------------------------------------------------------------------------------------------------------------------------------------------|----------------|---------|
| Author and Publication Year | Study Design               | Sample Size           | Mean Age: y.m         | Clinical Indication of GH Therapy. N (%)                                                                                                                        | Method of assessing adherence                                                                             | Prevalence of Non-adherence/Adherence for GHD                                                                                                                                                                                                                                                                                     | Factors Associated with Non Adherence                                                                                                                                                                        | Factors not Associated with Non-Adherence                                                                                                            | Quality Rating |         |
| Lass et al. (2015) [31]     | Retrospective              | 103 patients          | 10.1 (range 8.1-12.2) | GHD = 74 (72)<br>Turner Syndrome= 4 (4)<br>SHOX deficiency= 3 (3)<br>Small for gestational age= 21 (20)<br>Prader-Willi-syndrome= 1 (1)                         | Prescription refill rates                                                                                 | Adherence rate of GHD children treated with with rhGH (n=74) was good in 53%, medium in 23% and poor in 24%.                                                                                                                                                                                                                      | Treatment duration<br>Puberty (age)<br>Self-administration                                                                                                                                                   | Type of injection device                                                                                                                             | Good           |         |
| Aydin et al. (2014) [32]    | Longitudinal observational | 217 GH-naïve patients | 11.1±3.1 years        | GHD = 185 (85.3)<br>Turner Syndrome = 16 (7.4)<br>Neurosecretory Dysfunction = 6 (2.8)<br>Interuterine Growth Retardation = 5 (2.3)<br>Bioinactive GH = 5 (2.3) | Patient Self report<br>Questionnaire - evaluated at initiation, 3rd, 6th and 12 month of therapy.         | 3 months: adherence rate was excellent in 87.0% of cases, good in 8.1%, fair in 1.6% and poor in 3.2% of cases.<br>6 months: adherence was excellent in 85.4%, good in 7.0%, fair in 2.7% and poor in 4.9% of patients.<br>12 months: adherence was excellent in 77.3%. good in 13.5%, fair in 2.2% and poor in 7.0% of patients. | Forgetting to administer GH<br>Failure to renew the prescription<br>Problems with the delivery service<br>Illness<br>Vacation/break<br>Patient or person who administered the injection being away from home | Cause of GH treatment<br>Socioeconomic status of the family<br>Person who administered the injections<br>Type of injection device<br>GH product used | Good           |         |
| Hartman et al. (2013) [12]  | Prospective Observational  | 75 children           | 12.5±3.5 years        | GHD = 48 (64)<br>Turner Syndrome= 6 (8)<br>Small for gestational age= 18 (24)<br>Chronic Renal Failure = 3 (4)                                                  | Easypod® administration device in conjunction with the clinical kit software - Easypod® Connect Software. | Children with GHD showed poor compliance 22.9%, with 77.1% showing good compliance.                                                                                                                                                                                                                                               | Age (increasing)                                                                                                                                                                                             | Diagnosis                                                                                                                                            | Good           |         |

|                                          |                             |                                                                     |                                                                                           |                                                                                                                                                             |                                                                                                                                            |                                                                                                                                                                                           |                                                                                                                                                                                                                                                                                                                                                                                                                                                                                                       |                                                                                     |      |
|------------------------------------------|-----------------------------|---------------------------------------------------------------------|-------------------------------------------------------------------------------------------|-------------------------------------------------------------------------------------------------------------------------------------------------------------|--------------------------------------------------------------------------------------------------------------------------------------------|-------------------------------------------------------------------------------------------------------------------------------------------------------------------------------------------|-------------------------------------------------------------------------------------------------------------------------------------------------------------------------------------------------------------------------------------------------------------------------------------------------------------------------------------------------------------------------------------------------------------------------------------------------------------------------------------------------------|-------------------------------------------------------------------------------------|------|
| <b>Cutfield et al.(2011) [3]</b>         | Cross-sectional survey      | 175 patients                                                        | 12.1±0.6 years                                                                            | GHD = 100 (57%)<br>Turner Syndrome = 47 (27%)<br>Idiopathic short stature =12 (7%)<br>Small for gestational age = 11 (6%)<br>Prader Willi Syndrome = 5 (3%) | Two parameters: either the number of GH vials requested (GHreq) by the family each month or the number of empty GH vials returned (GHret). | The overall estimated rate of non-compliance (i.e. patients missing more than one injection per week) was 66% (73/110) according to GHret ( <i>and 34% (59/172) according to Ghreq</i> ). | Maori ethnicity                                                                                                                                                                                                                                                                                                                                                                                                                                                                                       | Age<br>Gender<br>Clinical diagnosis<br>Area of residence                            | Good |
| <b>Kapoor et al. (2008) [17]</b>         | Retrospective observational | 75 patients                                                         | Median age: 12.3 years (range 8.9–14.8)<br><i>Mean age not specified</i>                  | GHD = 75 (100%)                                                                                                                                             | Issued rhGH prescriptions                                                                                                                  | [62% non-compliant] More than >1 injection/week was missed by 39% (29/75) of the children, and 23% (17/75) missed >2 injections/week.                                                     | Longer duration of treatment<br>Lack of choice of injection device<br>Short duration of GH prescriptions (<4 weeks)<br>Type of health professional providing training<br>Growth response - reduced height velocity                                                                                                                                                                                                                                                                                    | Age<br>Type of injection device used<br>Initial height standard deviation score SDS | Good |
| <b>Rosenfeld &amp; Bakker (2008) [2]</b> | Retrospective               | 724 [326 Adolescents (13-17yrs), 398 parents of children (4-12yrs)] | Adolescents (13-17yrs) and parents of children (4-12yrs)<br><i>Mean age not specified</i> | GHD = 326<br>398 of parents of children with GHD, Turner Syndrome or Idiopathic short stature                                                               | Self-report questionnaire and interview via telephone or internet                                                                          | [Overall = 71%] 64% of parents of children and 77% of teens yielded noncompliance levels.                                                                                                 | Understanding about GHD<br>Understanding of prescribed rhGH treatment<br>Misperceptions about the consequences of missed rhGH doses/minimisation of the seriousness of missed doses of GH<br>Inadequate contact with health-care providers<br>Training and rhGH administration technique (poor injection technique)<br>Acceptance and satisfaction with GH therapy<br>Discomfort with injections / Pain<br>Age - Adolescence<br>Dissatisfaction with treatment results<br>Doctor-patient relationship | Diagnosis<br>Type of injection device used                                          | Fair |

**Supplementary Table 9** Methods of Adherence and Prevalence rates

| Study Details          |      | Primary Outcome                                                                                                                            |                                              | Key Factor Findings                                                                                                                                                                                                                                                                                                                      |
|------------------------|------|--------------------------------------------------------------------------------------------------------------------------------------------|----------------------------------------------|------------------------------------------------------------------------------------------------------------------------------------------------------------------------------------------------------------------------------------------------------------------------------------------------------------------------------------------|
| Author                 | Year | Method of assessing adherence                                                                                                              | Observation Time Period                      | Prevalence of Non-adherence/ Adherence for GHD                                                                                                                                                                                                                                                                                           |
| Lass et al.[31]        | 2015 | Prescription refill rates                                                                                                                  | 1 year                                       | Adherence rate of GHD children treated with rhGH was good in 53%, medium in 23% and poor in <b>24%</b> .                                                                                                                                                                                                                                 |
| Aydin et al.[32]       | 2014 | Patient Self report Questionnaire - evaluated at initiation, 3rd, 6th and 12 month of therapy.                                             | 1 year (3, 6, 12 month time-points)          | 3 months: adherence rate was excellent in 87.0% of cases, good in 8.1%, fair in 1.6% and poor in 3.2% of cases.<br>6 months: adherence was excellent in 85.4%, good in 7.0%, fair in 2.7% and poor in 4.9% of patients.<br>12 months: adherence was excellent in 77.3%. good in 13.5%, fair in 2.2% and poor in <b>7.0%</b> of patients. |
| Hartman et al.[12]     | 2013 | Easypod® administration device in conjunction with the clinical kit software - Easypod® Connect Software.                                  | 343 ±201 days                                | Children with GHD showed poor compliance <b>22.9%</b> , with 77.1% showing good compliance.                                                                                                                                                                                                                                              |
| Cutfield et al.[3]     | 2011 | Two parameters: either the number of GH vials requested (GHreq) by the family each month or the number of empty GH vials returned (GHret). | 4 months                                     | The overall estimated rate of non-compliance (i.e. patients missing more than one injection per week) was <b>66%</b> (73/110) according to GHret ( <i>and 34%</i> (59/172) according to Ghreq).                                                                                                                                          |
| Kapoor et al.[17]      | 2008 | Issued rhGH prescriptions                                                                                                                  | 3 x 1 year (1999–2000; 2000–2001; 2002–2003) | [ <b>62%</b> non-compliant] More than >1 injection/week was missed by 39% (29/75) of the children, and 23% (17/75) missed >2 injections/week.                                                                                                                                                                                            |
| Rosenfeld & Bakker [2] | 2008 | Self-report questionnaire and interview via telephone or internet                                                                          | 3 months                                     | [Overall = <b>71%</b> ] 64% of parents of children and 77% of teens yielded noncompliance levels.                                                                                                                                                                                                                                        |

**Supplementary Table 10** Potentially modifiable factors associated with lower adherence to rhGH treatment in paediatric GHD patients – categorised within the COM-B framework

| CAPABILITY                                                                             | OPPORTUNITY                                                      | MOTIVATION                                                                                                            |
|----------------------------------------------------------------------------------------|------------------------------------------------------------------|-----------------------------------------------------------------------------------------------------------------------|
| <b>Physical Capability</b>                                                             | <b>Physical Opportunity</b>                                      | <b>Reflective Motivation</b>                                                                                          |
| Poor GH administration technique [2]                                                   | Discomfort and pain associated with daily injections [2]         | Dissatisfaction and non-acceptance of rhGH therapy [2]                                                                |
| Self-administration ( <i>skill</i> ) [31]*                                             | Long duration of Treatment [17, 31]                              | Lack of choice of injection device [17]*                                                                              |
|                                                                                        | Short duration of GH prescriptions (<4 weeks) [17]               | Dissatisfaction with treatment results [2, 17]                                                                        |
|                                                                                        | Problems with the delivery service [32]                          | Self-administration ( <i>confidence/self-efficacy</i> ) [31]*                                                         |
|                                                                                        | Lack of choice of injection device (HCP) [17]*                   |                                                                                                                       |
| <b>Psychological Capability</b>                                                        | <b>Social Opportunity</b>                                        | <b>Automatic Motivation</b>                                                                                           |
| Lack of understanding about GHD [2]                                                    | rhGH administration training provided by non-hospital staff [17] | Lifestyle disruptions to routine and scheduling issues (Being away from home [32], Vacation/Break [32], Illness [32]) |
| Lack of understanding of prescribed rhGH treatment [2]                                 | Inadequate contact with health-care providers [2]                |                                                                                                                       |
| Patient or family's lack of understanding of the consequences of missed rhGH doses [2] | Poor doctor-patient relationship [2]                             |                                                                                                                       |
| Forgetting to administer GH [32]                                                       |                                                                  |                                                                                                                       |
| Failure/neglect to renew the prescription [32]                                         |                                                                  |                                                                                                                       |

\*NOTE: Two factors (self-administration [31] and lack of choice of injection device [17]) have been mapped onto two relevant COM-B sub-components (see Discussion).
